# Supplementary material for: Analysis of Volatile Profile and Aromatic Characteristics of Raw Pu-erh Tea during Storage Based on GC-MS and Odor Activity Value
Source: MDPI journal article supplement (doi:10.3390/foods12193568), 2023-09-26
Supplement: s1 [file s1]

## Supplementary Materials

**Table S1**

Volatile compounds identified in RAPT samples from different storage durations

| Volatile compounds                       | RI  | Concentration (µg/100g) |                          |                         |                        |                         |                         |                         |                         |                         |                         |                          |
|------------------------------------------|-----|-------------------------|--------------------------|-------------------------|------------------------|-------------------------|-------------------------|-------------------------|-------------------------|-------------------------|-------------------------|--------------------------|
|                                          |     | T0                      | T1                       | T2                      | T3                     | T4                      | T5                      | T6                      | T7                      | T8                      | T9                      | T10                      |
| Hexanal                                  | 800 | —                       | 0.45±0.06                | 6.04±0.80               | —                      | —                       | 1.38±0.22               | 0.41±0.02               | 0.52±0.06               | 0.53±0.01               | 0.64±0.12               | 0.65±0.05                |
| 3-methyl-Butanoic acid                   | 811 | 4.44±0.50 <sup>ef</sup> | 5.86±1.09 <sup>g</sup>   | 1.92±0.03 <sup>bc</sup> | 3.04±0.48 <sup>d</sup> | 5.12±0.40 <sup>f</sup>  | 3.75±0.37 <sup>de</sup> | 0.66±0.06 <sup>a</sup>  | 1.81±0.28 <sup>bc</sup> | 1.22±0.06 <sup>ab</sup> | 1.27±0.10 <sup>ab</sup> | 2.08±0.03 <sup>c</sup>   |
| 2-methyl-Butanoic acid                   | 811 | 5.03±0.82 <sup>f</sup>  | 4.55±0.76 <sup>f</sup>   | 2.37±0.03 <sup>c</sup>  | 3.26±0.32 <sup>e</sup> | 3.13±0.05 <sup>de</sup> | 2.52±0.31 <sup>cd</sup> | 0.61±0.10 <sup>a</sup>  | 1.09±0.19 <sup>ab</sup> | 0.64±0.13 <sup>a</sup>  | 1.35±0.23 <sup>b</sup>  | 1.43±0.08 <sup>b</sup>   |
| 1-ethyl-1H-Pyrrole                       | 829 | 1.37±0.02               | 0.95±0.03                | —                       | —                      | —                       | —                       | —                       | —                       | —                       | —                       | —                        |
| 1,2,5,5-tetra-methyl-1,3-Cyclopentadiene | 840 | 2.78±0.36 <sup>bc</sup> | 2.32±0.07 <sup>bc</sup>  | 1.44±0.26 <sup>a</sup>  | 5.37±0.76 <sup>e</sup> | 3.68±0.63 <sup>d</sup>  | 2.02±0.25 <sup>ab</sup> | 2.26±0.11 <sup>bc</sup> | 1.52±0.23 <sup>a</sup>  | 2.38±0.26 <sup>bc</sup> | 2.2±0.40 <sup>bc</sup>  | 4.30±0.33 <sup>d</sup>   |
| (Z)-3-Hexen-1-ol                         | 851 | 3.02±0.21               | 2.92±0.28                | —                       | —                      | —                       | —                       | —                       | —                       | —                       | —                       | —                        |
| 2-Hexenal                                | 853 | —                       | —                        | 3.34±0.56               | 6.65±0.39              | 11.02±0.49              | 3.75±0.44               | 5.88±1.00               | 3.16±0.53               | 7.68±1.61               | 6.13±0.51               | 6.79±0.82                |
| 1-Hexanol                                | 867 | 5.58±0.07 <sup>f</sup>  | 5.80±0.79 <sup>f</sup>   | 3.05±0.03 <sup>cd</sup> | 4.06±0.30 <sup>e</sup> | 4.62±0.73 <sup>e</sup>  | 3.20±0.39 <sup>d</sup>  | 2.29±0.10 <sup>b</sup>  | 2.14±0.36 <sup>ab</sup> | 3.01±0.16 <sup>cd</sup> | 1.53±0.31 <sup>a</sup>  | 2.36±0.35 <sup>bc</sup>  |
| p-Xylene                                 | 870 | 1.79±0.28 <sup>ab</sup> | 1.92±0.21 <sup>abc</sup> | 1.72±0.29 <sup>ab</sup> | 5.71±0.40 <sup>f</sup> | 4.22±0.61 <sup>e</sup>  | 1.67±0.32 <sup>a</sup>  | 2.62±0.07 <sup>d</sup>  | 2.54±0.26 <sup>d</sup>  | 2.88±0.03 <sup>d</sup>  | 2.46±0.18 <sup>cd</sup> | 2.28±0.46 <sup>bcd</sup> |

|                                             |     |                             |                              |                              |                             |                             |                              |                              |                               |                              |                              |                              |
|---------------------------------------------|-----|-----------------------------|------------------------------|------------------------------|-----------------------------|-----------------------------|------------------------------|------------------------------|-------------------------------|------------------------------|------------------------------|------------------------------|
| 2-Heptanone                                 | 889 | 4.15±0.<br>54 <sup>de</sup> | 3.94±0.<br>20 <sup>de</sup>  | 2.78±0.<br>.01 <sup>ab</sup> | 3.81±0.<br>57 <sup>c</sup>  | 5.83±0.<br>77 <sup>f</sup>  | 4.58±0.<br>08 <sup>c</sup>   | 2.99±0.<br>29 <sup>ab</sup>  | 2.36±0.<br>30 <sup>a</sup>    | 3.06±0.<br>11 <sup>b</sup>   | 3.98±0.<br>12 <sup>de</sup>  | 2.34±0.<br>17 <sup>a</sup>   |
| Heptanal                                    | 901 | 4.58±0.<br>76 <sup>ab</sup> | 4.51±0.<br>48 <sup>ab</sup>  | 7.8±0.<br>18 <sup>de</sup>   | 6.68±0.<br>53 <sup>cd</sup> | 8.71±1.<br>07 <sup>e</sup>  | 7.09±0.<br>42 <sup>d</sup>   | 7.03±1.<br>17 <sup>d</sup>   | 3.42±0.<br>45 <sup>a</sup>    | 7.60±0.<br>13 <sup>de</sup>  | 5.69±0.<br>35 <sup>bc</sup>  | 5.16±1.<br>03 <sup>b</sup>   |
| 2-Propenoic<br>acid, butyl ester            | 902 | 1.23±0.<br>13               | —                            | —                            | —                           | —                           | —                            | —                            | —                             | —                            | —                            | —                            |
| 2-butoxy-Etha<br>nol                        | 907 | —                           | 0.46±0.<br>05                | —                            | —                           | 1.59±0.<br>02               | —                            | 0.94±0.<br>18                | 0.50±0.<br>06                 | 0.38±0.<br>07                | 0.64±0.<br>07                | 0.66±0.<br>09                |
| Hexanoic acid,<br>methyl ester              | 924 | —                           | —                            | —                            | —                           | 0.99±0.<br>06               | —                            | 0.39±0.<br>04                | 2.36±0.<br>30                 | 0.50±0.<br>03                | —                            | —                            |
| Camphene                                    | 933 | —                           | —                            | —                            | —                           | —                           | —                            | 1.20±0.<br>10                | 1.32±0.<br>23                 | —                            | —                            | —                            |
| α-Pinene                                    | 939 | 0.58±0.<br>09 <sup>ab</sup> | 0.64±0.<br>07 <sup>bc</sup>  | 0.45±0.<br>.07 <sup>a</sup>  | 0.50±0.<br>01 <sup>a</sup>  | 0.78±0.<br>03 <sup>cd</sup> | 0.77±0.<br>11 <sup>cd</sup>  | 0.82±0.<br>12 <sup>d</sup>   | 1.05±0.<br>09 <sup>e</sup>    | 1.04±0.<br>07 <sup>e</sup>   | 1.04±0.<br>08 <sup>e</sup>   | 0.75±0.<br>04 <sup>cd</sup>  |
| 2-Octanone                                  | 952 | 0.53±0.<br>04               | —                            | —                            | —                           | —                           | 1.36±0.<br>24                | —                            | —                             | —                            | —                            | —                            |
| Hexanoic acid                               | 961 | 26.59±<br>3.60              | 25.95±<br>2.40               | 9.51±1<br>.53                | —                           | 27.39±<br>0.27              | 26.98±<br>5.34               | —                            | —                             | —                            | —                            | —                            |
| 1-(3-methylen<br>ecyclopentyl)-<br>Ethanone | 963 | —                           | —                            | —                            | —                           | —                           | —                            | 0.73±0.<br>03                | 0.59±0.<br>09                 | —                            | —                            | —                            |
| Benzaldehyde                                | 966 | 14.77±<br>0.67 <sup>a</sup> | 18.15±<br>0.58 <sup>ab</sup> | 35.90±<br>4.64 <sup>d</sup>  | 26.23±<br>1.89 <sup>c</sup> | 46.78±<br>4.13 <sup>e</sup> | 24.25±<br>4.58 <sup>bc</sup> | 18.65±<br>1.86 <sup>ab</sup> | 20.73±<br>1.42 <sup>abc</sup> | 23.83±<br>4.25 <sup>bc</sup> | 21.93±<br>4.13 <sup>bc</sup> | 24.15±<br>4.26 <sup>bc</sup> |
| 3,5,5-trimethyl<br>-2-Hexene                | 968 | 37.93±<br>1.16 <sup>g</sup> | 19.55±<br>2.69 <sup>f</sup>  | 7.66±1<br>.02 <sup>d</sup>   | 7.12±0.<br>70 <sup>cd</sup> | 10.46±<br>1.57 <sup>e</sup> | 8.69±1.<br>55 <sup>de</sup>  | 3.33±0.<br>50 <sup>ab</sup>  | 3.30±0.<br>58 <sup>ab</sup>   | 2.89±0.<br>56 <sup>a</sup>   | 4.41±0.<br>10 <sup>ab</sup>  | 5.28±0.<br>87 <sup>bc</sup>  |

|                                                            |       |                           |                          |                           |                           |                         |                          |                            |                            |                          |                          |                           |
|------------------------------------------------------------|-------|---------------------------|--------------------------|---------------------------|---------------------------|-------------------------|--------------------------|----------------------------|----------------------------|--------------------------|--------------------------|---------------------------|
| 2-Methylenecyclohexanol                                    | 974   | —                         | —                        | —                         | —                         | —                       | —                        | 2.71±0.49                  | 3.34±0.68                  | 3.81±0.08                | 4.78±0.69                | —                         |
| 1-Octen-3-ol                                               | 976   | 95.72±2.24 <sup>g</sup>   | 51.67±5.98 <sup>f</sup>  | 26.59±2.40 <sup>d</sup>   | 23.11±2.95 <sup>cd</sup>  | 36.69±1.59 <sup>e</sup> | 21.79±1.34 <sup>c</sup>  | 11.90±0.74 <sup>a</sup>    | 12.06±2.07 <sup>a</sup>    | 12.57±1.39 <sup>ab</sup> | 17.11±0.51 <sup>b</sup>  | 15.51±2.53 <sup>ab</sup>  |
| 2,3-Octanedione                                            | 986   | 7.45±0.87 <sup>c</sup>    | 4.24±0.16 <sup>ab</sup>  | 5.39±0.86 <sup>b</sup>    | 9.51±1.89 <sup>d</sup>    | 7.45±1.40 <sup>c</sup>  | 4.07±0.83 <sup>ab</sup>  | 3.12±0.16 <sup>a</sup>     | 2.74±0.52 <sup>a</sup>     | 3.71±0.43 <sup>a</sup>   | 2.65±0.02 <sup>a</sup>   | 3.08±0.32 <sup>a</sup>    |
| 6-methyl-5-Hepten-2-one                                    | 987   | 19.46±1.55 <sup>ef</sup>  | 14.85±0.99 <sup>cd</sup> | 12.83±1.47 <sup>abc</sup> | 16.39±3.17 <sup>cde</sup> | 21.93±3.56 <sup>f</sup> | 17.33±3.32 <sup>de</sup> | 10.80±1.05 <sup>ab</sup>   | 9.99±1.93 <sup>ab</sup>    | 9.30±1.33 <sup>a</sup>   | 13.45±0.59 <sup>bc</sup> | 12.93±0.69 <sup>abc</sup> |
| β-Myrcene                                                  | 992   | —                         | 17.95±0.84               | —                         | —                         | —                       | 21.02±3.18               | —                          | —                          | —                        | 16.13±0.84               | 12.85±1.02                |
| (2R,5R)-2-Methyl-5-(prop-1-en-2-yl)-2-vinyltetrahydrofuran | 993.8 | 4.74±0.32 <sup>a</sup>    | 5.62±0.07 <sup>ab</sup>  | 4.89±0.76 <sup>ab</sup>   | 7.50±1.42 <sup>cd</sup>   | 11.66±1.55 <sup>e</sup> | 6.53±1.16 <sup>abc</sup> | 5.03±0.01 <sup>ab</sup>    | 5.78±1.14 <sup>abc</sup>   | 6.62±0.14 <sup>bc</sup>  | 8.92±1.46 <sup>d</sup>   | 6.30±0.58 <sup>abc</sup>  |
| Octanal                                                    | 1001  | 7.28±0.09 <sup>ab</sup>   | 6.62±0.67 <sup>ab</sup>  | 6.01±0.27 <sup>a</sup>    | 6.26±1.19 <sup>a</sup>    | 18.80±0.89 <sup>d</sup> | 11.07±1.91 <sup>c</sup>  | 6.98±0.59 <sup>ab</sup>    | 6.21±0.97 <sup>a</sup>     | 8.56±1.28 <sup>b</sup>   | 8.36±1.42 <sup>b</sup>   | 7.43±1.07 <sup>ab</sup>   |
| (E,E)-2,4-Heptadienal                                      | 1011  | 11.52±0.35 <sup>abc</sup> | 10.40±0.30 <sup>a</sup>  | 10.68±2.06 <sup>ab</sup>  | 15.28±0.40 <sup>c</sup>   | 18.85±1.86 <sup>f</sup> | 11.11±1.87 <sup>ab</sup> | 13.18±1.21 <sup>bcde</sup> | 12.34±2.32 <sup>abcd</sup> | 14.41±0.18 <sup>de</sup> | 14.13±0.28 <sup>de</sup> | 13.92±1.45 <sup>cde</sup> |
| α-Terpinene                                                | 1018  | 4.93±0.23 <sup>ab</sup>   | 5.96±0.12 <sup>cd</sup>  | 4.64±0.50 <sup>ab</sup>   | 6.40±0.19 <sup>d</sup>    | 8.56±0.11 <sup>c</sup>  | 5.97±0.39 <sup>cd</sup>  | 4.82±0.46 <sup>ab</sup>    | 5.12±0.45 <sup>bc</sup>    | 5.40±0.35 <sup>bc</sup>  | 6.67±1.18 <sup>d</sup>   | 4.03±0.64 <sup>a</sup>    |
| Benzyl chloride                                            | 1019  | 1.50±0.05 <sup>d</sup>    | 1.01±0.13 <sup>abc</sup> | 1.06±0.18 <sup>bc</sup>   | 1.62±0.08 <sup>de</sup>   | 1.72±0.07 <sup>e</sup>  | 1.05±0.18 <sup>abc</sup> | 1.15±0.15 <sup>bc</sup>    | 0.97±0.16 <sup>ab</sup>    | 1.22±0.09 <sup>c</sup>   | 0.82±0.09 <sup>a</sup>   | 0.94±0.01 <sup>ab</sup>   |
| o-Cymene                                                   | 1026  | 4.22±0.16                 | —                        | —                         | 15.27±2.08                | —                       | 19.3±3.55                | —                          | —                          | —                        | —                        | —                         |

|                                       |        |                          |                          |                           |                           |                          |                           |                          |                          |                          |                          |                           |
|---------------------------------------|--------|--------------------------|--------------------------|---------------------------|---------------------------|--------------------------|---------------------------|--------------------------|--------------------------|--------------------------|--------------------------|---------------------------|
| 2-ethyl-1-Hexanol                     | 1026.3 | 3.74±0.64 <sup>a</sup>   | 56.79±4.80 <sup>f</sup>  | 33.71±6.19 <sup>c</sup>   | 32.19±3.17 <sup>c</sup>   | 60.63±5.05 <sup>f</sup>  | 19.3±3.55 <sup>b</sup>    | 28.46±0.87 <sup>c</sup>  | 49.97±1.65 <sup>e</sup>  | 42.02±0.52 <sup>d</sup>  | 56.39±0.84 <sup>f</sup>  | 49.57±3.43 <sup>e</sup>   |
| D-Limonene                            | 1030   | 44.37±7.79 <sup>b</sup>  | 68.31±1.50 <sup>d</sup>  | 74.91±12.27 <sup>cd</sup> | 27.88±3.64 <sup>d</sup>   | 74.48±4.30 <sup>a</sup>  | 57.35±11.33 <sup>bc</sup> | 45.45±3.18 <sup>b</sup>  | 55.43±8.92 <sup>b</sup>  | 53.03±4.01 <sup>b</sup>  | 69.44±5.84 <sup>cd</sup> | 43.89±7.40 <sup>b</sup>   |
| Benzyl alcohol                        | 1034.4 | 14.21±0.19               | —                        | —                         | 12.43±0.26                | —                        | —                         | —                        | —                        | —                        | —                        | —                         |
| 2,6-dimethyl-5-Heptenal               | 1044   | 25.51±0.37 <sup>e</sup>  | 21.35±1.30 <sup>cd</sup> | 18.09±3.51 <sup>bc</sup>  | 25.65±2.28 <sup>e</sup>   | 24.54±3.10 <sup>de</sup> | 20.66±2.77 <sup>c</sup>   | 13.24±0.91 <sup>a</sup>  | 14.65±2.43 <sup>ab</sup> | 15.89±0.06 <sup>ab</sup> | 13.44±1.49 <sup>a</sup>  | 12.94±0.81 <sup>a</sup>   |
| Benzeneacetaldehyde                   | 1049   | 11.93±0.26 <sup>ab</sup> | 9.98±0.62 <sup>a</sup>   | 11.99±1.36 <sup>ab</sup>  | 22.67±0.96 <sup>d</sup>   | 22.44±3.00 <sup>d</sup>  | 11.63±1.93 <sup>ab</sup>  | 12.24±1.19 <sup>ab</sup> | 12.24±2.10 <sup>ab</sup> | 19.25±0.65 <sup>c</sup>  | 14.11±0.30 <sup>b</sup>  | 17.16±0.73 <sup>c</sup>   |
| (Z)-3,7-dimethyl-1,3,6-Octatriene     | 1051   | 6.53±0.26 <sup>ab</sup>  | 8.29±0.68 <sup>cde</sup> | 7.43±0.68 <sup>abcd</sup> | 9.44±0.35 <sup>e</sup>    | 10.86±0.37 <sup>f</sup>  | 7.81±0.93 <sup>bcd</sup>  | 6.94±0.38 <sup>ab</sup>  | 6.44±0.86 <sup>a</sup>   | 7.14±0.44 <sup>abc</sup> | 8.52±0.54 <sup>de</sup>  | 7.54±1.29 <sup>abcd</sup> |
| 1H-Pyrrole-2-carboxaldehyde, 1-ethyl- | 1054   | 25.94±0.51 <sup>e</sup>  | 23.39±2.05 <sup>de</sup> | 23.00±4.15 <sup>de</sup>  | 24.66±3.13 <sup>de</sup>  | 32.01±2.66 <sup>f</sup>  | 20.12±3.50 <sup>cd</sup>  | 10.05±0.31 <sup>a</sup>  | 12.15±2.43 <sup>a</sup>  | 9.05±1.36 <sup>a</sup>   | 13.20±0.29 <sup>ab</sup> | 17.39±3.04 <sup>bc</sup>  |
| 2-Octenal, (E)-                       | 1056.7 | —                        | —                        | —                         | —                         | —                        | —                         | —                        | 2.11±0.31                | —                        | 2.87±0.05                | —                         |
| Ethanone, 1-(1H-pyrrol-2-yl)-         | 1063.2 | 13.99±1.34 <sup>bc</sup> | 13.35±0.74 <sup>b</sup>  | 13.25±0.65 <sup>b</sup>   | 25.82±0.14 <sup>d</sup>   | 23.12±2.73 <sup>d</sup>  | 16.67±2.63 <sup>c</sup>   | 11.84±0.82 <sup>ab</sup> | 12.01±1.22 <sup>ab</sup> | 12.96±2.29 <sup>ab</sup> | 12.39±2.09 <sup>ab</sup> | 9.93±1.76 <sup>a</sup>    |
| γ-Terpinene                           | 1064   | 12.38±2.06 <sup>bc</sup> | 13.80±1.93 <sup>cd</sup> | 15.40±2.70 <sup>d</sup>   | 12.75±0.50 <sup>bcd</sup> | 10.23±0.88 <sup>b</sup>  | 6.90±0.21 <sup>a</sup>    | 6.32±0.08 <sup>a</sup>   | 10.18±1.49 <sup>b</sup>  | 7.18±0.67 <sup>a</sup>   | 13.09±0.20 <sup>cd</sup> | 12.61±2.44 <sup>bcd</sup> |
| (E)-2-Octen-1-ol                      | 1067   | 59.44±2.59 <sup>g</sup>  | 34.28±3.24 <sup>f</sup>  | 28.8±0.29 <sup>e</sup>    | 27.26±0.19 <sup>e</sup>   | 27.93±0.66 <sup>e</sup>  | 18.67±1.05 <sup>d</sup>   | 13.39±0.38 <sup>c</sup>  | 9.72±1.11 <sup>b</sup>   | 6.22±0.82 <sup>a</sup>   | 9.99±0.55 <sup>b</sup>   | 9.81±0.55 <sup>b</sup>    |

|                                                 |                    |                               |                                               |                                              |                                |                               |                                               |                                               |                               |                               |                                |                                               |
|-------------------------------------------------|--------------------|-------------------------------|-----------------------------------------------|----------------------------------------------|--------------------------------|-------------------------------|-----------------------------------------------|-----------------------------------------------|-------------------------------|-------------------------------|--------------------------------|-----------------------------------------------|
| 1-Octanol                                       | 1068               | 20.41±<br>0.43 <sup>c</sup>   | 25.39±<br>1.53 <sup>d</sup>                   | 27.68±<br>5.06 <sup>d</sup>                  | 49.66±<br>0.06 <sup>f</sup>    | 39.84±<br>2.93 <sup>e</sup>   | 26.91±<br>4.28 <sup>d</sup>                   | 8.53±1.<br>21 <sup>ab</sup>                   | 7.62±0.<br>37 <sup>a</sup>    | 12.67±<br>0.51 <sup>b</sup>   | 10.15±<br>0.95 <sup>ab</sup>   | 10.55±<br>1.29 <sup>ab</sup>                  |
| trans-Linalool<br>oxide (furanoid)              | 1076               | 46.04±<br>4.44 <sup>ab</sup>  | 44.25±<br>4.77 <sup>ab</sup>                  | 61.16±<br>6.85 <sup>cd</sup>                 | 76.5±1<br>4.48 <sup>e</sup>    | 67.97±<br>2.44 <sup>de</sup>  | 52.65±<br>7.51 <sup>bc</sup>                  | 41.15±<br>3.95 <sup>ab</sup>                  | 38.55±<br>5.53 <sup>a</sup>   | 43.51±<br>7.40 <sup>ab</sup>  | 43.03±<br>2.98 <sup>ab</sup>   | 49.44±<br>1.17 <sup>ab</sup>                  |
| endo-2-Methyl<br>bicyclo[3.3.1]n<br>onane       | 1083<br>.343<br>72 | 0.85±0.<br>12                 | —                                             | —                                            | —                              | —                             | —                                             | —                                             | 1.53±0.<br>16                 | —                             | —                              | —                                             |
| cis-5-ethenylte<br>t                            |                    |                               |                                               |                                              |                                |                               |                                               |                                               |                               |                               |                                |                                               |
| rahydro-α, α,<br>5-trimethyl-2-<br>Fu           | 1088               | 90.90±<br>3.28 <sup>cd</sup>  | 88.30±<br>8.28 <sup>cd</sup>                  | 103.91<br>±8.67 <sup>d</sup><br><sub>e</sub> | 93.83±<br>18.50 <sup>cde</sup> | 108.56<br>±3.73 <sup>e</sup>  | 79.86±<br>12.01 <sup>bc</sup>                 | 65.34±<br>8.57 <sup>ab</sup>                  | 52.30±<br>9.05 <sup>a</sup>   | 61.88±<br>6.83 <sup>a</sup>   | 66.3±3.<br>94 <sup>ab</sup>    | 66.69±<br>8.19 <sup>ab</sup>                  |
| ranmethanol                                     |                    |                               |                                               |                                              |                                |                               |                                               |                                               |                               |                               |                                |                                               |
| 3,5-Octadien-2<br>-one                          | 1093               | —                             | —                                             | —                                            | —                              | 19.47±<br>0.73                | —                                             | 9.12±0.<br>41                                 | —                             | —                             | —                              | —                                             |
| 3-Cyclohexen-<br>1-one,<br>3,5,5-trimethyl<br>— | 1097               | 1.56±0.<br>25                 | —                                             | —                                            | —                              | —                             | —                                             | —                                             | —                             | —                             | —                              | —                                             |
| 2-Cyclohexen-<br>1-one,<br>3,4,4-trimethyl<br>— | 1097               | —                             | —                                             | 0.63±0<br>.05                                | —                              | 0.94±0.<br>10                 | 0.73±0.<br>14                                 | —                                             | —                             | 0.67±0.<br>11                 | —                              | —                                             |
| Linalool                                        | 1106               | 271.51<br>±2.55 <sup>de</sup> | 253.54<br>±15.61 <sup>d</sup><br><sub>e</sub> | 275.46<br>±46.89<br><sub>e</sub>             | 482.41<br>±5.36 <sup>g</sup>   | 332.09<br>±29.48 <sup>f</sup> | 231.47<br>±27.77 <sup>c</sup><br><sub>d</sub> | 182.61<br>±19.81 <sup>a</sup><br><sub>b</sub> | 161.46<br>±29.32 <sup>a</sup> | 209.00<br>±6.52 <sup>bc</sup> | 201.65<br>±8.40 <sup>abc</sup> | 184.53<br>±20.76 <sup>a</sup><br><sub>b</sub> |

|                                                |        |                           |                          |                          |                           |                          |                           |                          |                          |                          |                          |                         |
|------------------------------------------------|--------|---------------------------|--------------------------|--------------------------|---------------------------|--------------------------|---------------------------|--------------------------|--------------------------|--------------------------|--------------------------|-------------------------|
| 3,7-dimethyl-1,5,7-Octatrien-3-ol              | 1106   | 70.30±1.19 <sup>def</sup> | 63.29±5.05 <sup>cd</sup> | 82.77±13.45 <sup>f</sup> | 78.88±14.00 <sup>ef</sup> | 112.34±3.17 <sup>g</sup> | 67.20±11.20 <sup>de</sup> | 51.62±2.36 <sup>bc</sup> | 43.34±8.27 <sup>ab</sup> | 29.66±4.87 <sup>a</sup>  | 41.49±1.24 <sup>ab</sup> | 37.53±1.89 <sup>a</sup> |
| (E,E)-2,4-Octadienal                           | 1113   | —                         | —                        | —                        | —                         | —                        | —                         | —                        | 3.16±0.45                | —                        | 3.53±0.07                | —                       |
| 2,6-dimethyl-Cyclohexanol                      | 1114   | 28.45±0.56 <sup>bc</sup>  | 27.36±3.32 <sup>bc</sup> | 43.77±7.89 <sup>d</sup>  | 31.94±3.72 <sup>c</sup>   | 32.85±5.38 <sup>c</sup>  | 23.78±4.75 <sup>b</sup>   | 13.27±2.32 <sup>a</sup>  | 11.37±1.90 <sup>a</sup>  | 13.43±1.89 <sup>a</sup>  | 11.54±0.61 <sup>a</sup>  | 16.37±0.01 <sup>a</sup> |
| Phenylethyl Alcohol                            | 1116   | 22.40±0.32                | 19.74±1.41               | —                        | 34.19±5.41                | 32.15±0.47               | —                         | —                        | 12.63±2.50               | —                        | 13.73±1.58               | —                       |
| 2-ethyl-Hexanoic acid                          | 1116.7 | —                         | 4.03±0.50                | —                        | 6.62±1.15                 | —                        | —                         | —                        | —                        | 4.68±0.53                | —                        | —                       |
| 2,6,6-trimethyl-2-Cyclohexene-1-carboxaldehyde | 1122.9 | —                         | —                        | —                        | —                         | 4.65±0.74                | —                         | 6.71±0.41                | 8.39±0.84                | 5.51±0.94                | 8.16±0.76                | 9.35±1.53               |
| Isophorone                                     | 1124   | 2.69±0.28 <sup>a</sup>    | 2.79±0.48 <sup>a</sup>   | 4.72±0.86 <sup>cd</sup>  | 5.18±0.67 <sup>d</sup>    | 5.61±0.60 <sup>d</sup>   | 3.94±0.47 <sup>bc</sup>   | 2.52±0.09 <sup>a</sup>   | 2.67±0.45 <sup>a</sup>   | 2.84±0.52 <sup>a</sup>   | 2.67±0.21 <sup>a</sup>   | 3.72±0.45 <sup>b</sup>  |
| (E,Z)-2,6-dimethyl-2,4,6-Octatriene            | 1131   | —                         | —                        | 1.99±0.22                | —                         | —                        | —                         | —                        | —                        | —                        | —                        | 1.59±0.12               |
| E,E-2,6-Dimethyl-1,3,5,7-octatetraene          | 1132   | 2.73±0.18                 | 1.91±0.15                | 2.7±0.07                 | —                         | 2.64±0.37                | 1.17±0.18                 | —                        | —                        | —                        | 0.92±0.06                | —                       |
| 3-Nonen-2-one                                  | 1136   | 1.37±0.22 <sup>ab</sup>   | 1.49±0.14 <sup>abc</sup> | 1.73±0.23 <sup>abc</sup> | 2.79±0.34 <sup>d</sup>    | 3.50±0.62 <sup>e</sup>   | 2.51±0.27 <sup>d</sup>    | 1.24±0.17 <sup>a</sup>   | 1.32±0.16 <sup>a</sup>   | 1.48±0.24 <sup>abc</sup> | 1.96±0.18 <sup>c</sup>   | 1.89±0.14 <sup>bc</sup> |

|                                                               |        |                          |                          |                          |                          |                          |                          |                          |                          |                          |                          |                          |
|---------------------------------------------------------------|--------|--------------------------|--------------------------|--------------------------|--------------------------|--------------------------|--------------------------|--------------------------|--------------------------|--------------------------|--------------------------|--------------------------|
| Benzyl nitrile                                                | 1143   | —                        | —                        | —                        | —                        | 3.57±0.37                | 2.35±0.31                | 2.43±0.36                | 2.60±0.09                | 1.22±0.04                | —                        | 1.67±0.28                |
| (R,S)-5-Ethyl-6-methyl-3E-hepten-2-one                        | 1143.9 | 6.47±1.25                | —                        | —                        | —                        | —                        | —                        | —                        | —                        | —                        | —                        | —                        |
| 1,2-dimethoxy-Benzene                                         | 1146   | 6.51±1.21 <sup>a</sup>   | 11.85±1.11 <sup>de</sup> | 16.85±0.59 <sup>f</sup>  | 17.19±1.41 <sup>f</sup>  | 17.24±0.52 <sup>f</sup>  | 16.19±0.95 <sup>f</sup>  | 9.68±1.61 <sup>bc</sup>  | 8.28±1.34 <sup>ab</sup>  | 7.99±0.63 <sup>ab</sup>  | 10.65±0.19 <sup>cd</sup> | 13.52±0.09 <sup>e</sup>  |
| (E,E)-2,6-Nonadienal                                          | 1146   | —                        | —                        | —                        | —                        | —                        | 1.89±0.26                | —                        | 1.38±0.11                | —                        | —                        | 1.49±0.27                |
| 2,3,3-trimethyl-Bicyclo[2.2.1]heptan-2-ol                     | 1148   | 5.41±0.61 <sup>ef</sup>  | 4.97±0.92 <sup>cde</sup> | 5.39±0.21 <sup>ef</sup>  | 7.85±0.97 <sup>g</sup>   | 6.21±0.16 <sup>f</sup>   | 5.14±0.52 <sup>de</sup>  | 4.32±0.49 <sup>bcd</sup> | 3.15±0.04 <sup>a</sup>   | 4.01±0.83 <sup>abc</sup> | 5.94±0.12 <sup>ef</sup>  | 3.78±0.01 <sup>ab</sup>  |
| 1-Nonanol                                                     | 1169.2 | 10.81±0.17 <sup>cd</sup> | 8.38±0.42 <sup>ab</sup>  | 11.53±1.74 <sup>d</sup>  | 17.39±1.81 <sup>c</sup>  | 19.69±2.21 <sup>f</sup>  | 10.48±0.52 <sup>cd</sup> | 8.98±0.36 <sup>bc</sup>  | 8.03±1.46 <sup>ab</sup>  | 6.94±0.48 <sup>ab</sup>  | 7.74±0.07 <sup>ab</sup>  | 6.53±0.09 <sup>a</sup>   |
| 3,4-Dimethoxytoluene                                          | 1172   | —                        | —                        | —                        | —                        | —                        | —                        | 2.03±0.29                | —                        | —                        | 3.09±0.13                | 4.14±0.84                |
| DL-Menthol                                                    | 1173   | 48.93±0.51 <sup>ab</sup> | 58.07±1.32 <sup>bc</sup> | 74.09±10.77 <sup>d</sup> | 77.28±11.84 <sup>d</sup> | 67.90±7.93 <sup>cd</sup> | 45.88±9.17 <sup>ab</sup> | 48.32±2.93 <sup>ab</sup> | 46.46±5.97 <sup>ab</sup> | 45.21±0.99 <sup>ab</sup> | 39.29±2.84 <sup>a</sup>  | 176.36±15.6 <sup>c</sup> |
| Octanoic acid                                                 | 1173   | 14.04±0.41 <sup>c</sup>  | 15.77±0.98 <sup>c</sup>  | 26.17±4.85 <sup>de</sup> | 29.59±4.36 <sup>ef</sup> | 32.27±2.50 <sup>f</sup>  | 23.99±1.71 <sup>d</sup>  | 4.60±0.34 <sup>a</sup>   | 7.59±1.22 <sup>ab</sup>  | 7.69±1.30 <sup>ab</sup>  | 9.55±1.81 <sup>b</sup>   | 15.06±2.67 <sup>c</sup>  |
| (R)-4-methyl-1-(1-methyl-3-cyclohexen-1-yl)-3-cyclohexen-1-ol | 1175   | 13.83±0.27 <sup>a</sup>  | 19.14±1.47 <sup>b</sup>  | 22.41±3.93 <sup>bc</sup> | 32.01±5.03 <sup>d</sup>  | 31.49±3.08 <sup>d</sup>  | 25.00±2.56 <sup>c</sup>  | 19.52±1.30 <sup>b</sup>  | 18.24±3.07 <sup>ab</sup> | 21.57±1.50 <sup>bc</sup> | 22.86±0.80 <sup>bc</sup> | 21.79±1.69 <sup>bc</sup> |

|                                                         |      |                          |                           |                           |                          |                           |                             |                            |                           |                             |                           |                            |
|---------------------------------------------------------|------|--------------------------|---------------------------|---------------------------|--------------------------|---------------------------|-----------------------------|----------------------------|---------------------------|-----------------------------|---------------------------|----------------------------|
| (3R,6S)-2,2,6-Trimethyl-6-vinyltetrahydro-2H-pyran-3-ol | 1183 | 8.88±0.55 <sup>c</sup>   | 8.23±1.24 <sup>abc</sup>  | 12.01±2.03 <sup>d</sup>   | 14.64±2.63 <sup>e</sup>  | 11.63±1.26 <sup>d</sup>   | 8.25±0.38 <sup>abc</sup>    | 7.13±1.16 <sup>abc</sup>   | 6.01±0.71 <sup>a</sup>    | 8.44±0.70 <sup>bc</sup>     | 6.29±0.56 <sup>ab</sup>   | 7.52±0.01 <sup>abc</sup>   |
| Methyl salicylate                                       | 1187 | 39.34±0.18               | 29.65±2.16                | 35.28±4.83                | 37.53±3.98               | —                         | —                           | —                          | —                         | —                           | —                         | —                          |
| 4-trimethyl- $\alpha$ , $\alpha$ -Benzenemethanol       | 1188 | —                        | —                         | —                         | —                        | —                         | —                           | —                          | —                         | —                           | —                         | 7.23±0.58                  |
| $\alpha$ -Terpineol                                     | 1190 | 102.34±0.95 <sup>a</sup> | 136.06±8.53 <sup>bc</sup> | 165.38±28.08 <sup>d</sup> | 193.80±8.27 <sup>e</sup> | 200.51±12.53 <sup>e</sup> | 152.52±11.32 <sup>bcd</sup> | 125.56±20.12 <sup>ab</sup> | 103.74±18.79 <sup>a</sup> | 152.97±13.65 <sup>bcd</sup> | 133.27±8.64 <sup>bc</sup> | 159.20±20.92 <sup>cd</sup> |
| Naphthalene                                             | 1190 | 2.48±0.16                | 3.40±0.20                 | 4.29±0.63                 | —                        | 7.94±0.61                 | —                           | —                          | —                         | 4.14±0.18                   | —                         | —                          |
| 1-ethyl-2,5-Pyrrolidinedione                            | 1191 | 2.90±0.36                | —                         | —                         | 14.26±2.61               | —                         | —                           | 6.88±1.17                  | 4.39±0.86                 | 6.94±1.22                   | 6.30±0.38                 | 5.52±0.25                  |
| 2,6,6-trimethyl-1,3-Cyclohexadiene-1-carboxaldehyde     | 1205 | 24.66±0.15 <sup>d</sup>  | 22.10±1.60 <sup>c</sup>   | 26.42±0.11 <sup>de</sup>  | 32.52±3.37 <sup>f</sup>  | 35.64±0.08 <sup>g</sup>   | 27.49±2.06 <sup>e</sup>     | 20.81±0.18 <sup>c</sup>    | 14.67±0.09 <sup>a</sup>   | 17.96±0.67 <sup>b</sup>     | 16.29±1.32 <sup>ab</sup>  | 16.06±0.77 <sup>ab</sup>   |
| 2,3-dihydro-Benzofuran                                  | 1219 | 6.05±0.18                | 5.11±0.56                 | 5.99±0.93                 | 7.64±1.31                | 8.01±1.3                  | 4.69±0.09                   | 3.74±0.58                  | 2.98±0.37                 | 4.18±0.48                   | —                         | —                          |
| 2,6,6-trimethyl-1-Cyclohexene-1-carboxaldehyde          | 1220 | 24.58±0.27 <sup>d</sup>  | 17.79±1.31 <sup>c</sup>   | 19.28±1.60 <sup>c</sup>   | 26.38±0.49 <sup>e</sup>  | 27.02±1.39 <sup>e</sup>   | 13.92±1.17 <sup>b</sup>     | 10.2±0.25 <sup>a</sup>     | 8.32±1.44 <sup>a</sup>    | 9.82±0.26 <sup>a</sup>      | 9.07±0.27 <sup>a</sup>    | 9.93±1.29 <sup>a</sup>     |



[illegible]

|                                                                                         |      |                         |                         |                         |                         |                        |                        |                        |                         |                         |                         |                          |
|-----------------------------------------------------------------------------------------|------|-------------------------|-------------------------|-------------------------|-------------------------|------------------------|------------------------|------------------------|-------------------------|-------------------------|-------------------------|--------------------------|
| dihydro-5-pentyl-2(3H)-Furanone                                                         | 1362 | 7.83±0.15 <sup>f</sup>  | 2.84±0.17 <sup>a</sup>  | 5.15±0.63 <sup>d</sup>  | 3.83±0.63 <sup>bc</sup> | 9.06±0.17 <sup>g</sup> | 6.00±0.60 <sup>e</sup> | 4.38±0.50 <sup>c</sup> | 3.08±0.54 <sup>ab</sup> | 3.07±0.51 <sup>ab</sup> | 5.79±0.36 <sup>de</sup> | 3.60±0.26 <sup>abc</sup> |
| 10-Undecenoic acid, methyl ester                                                        | 1371 | 13.9±0.39               | 14.65±1.05              | 16.25±1.70              | —                       | 16.55±1.88             | —                      | —                      | —                       | —                       | —                       | —                        |
| Propanoic acid, 2-methyl-, (E)-1-(2,6,6-trimethyl-1,3-cyclohexadien-1-yl)-2-Buten-1-one | 1380 | 0.99±0.07 <sup>a</sup>  | 1.09±0.03 <sup>a</sup>  | 3.45±0.50 <sup>bc</sup> | 4.33±0.05 <sup>cd</sup> | 5.16±0.73 <sup>d</sup> | 2.87±0.43 <sup>b</sup> | 1.54±0.30 <sup>a</sup> | 9.35±1.48 <sup>e</sup>  | 3.96±0.54 <sup>c</sup>  | 4.34±0.17 <sup>cd</sup> | 3.98±0.43 <sup>c</sup>   |
|                                                                                         | 1388 | 3.38±0.01 <sup>ab</sup> | 4.05±0.39 <sup>bc</sup> | 5.4±0.48 <sup>d</sup>   | 5.69±0.69 <sup>d</sup>  | 6.73±0.80 <sup>e</sup> | 4.62±0.07 <sup>c</sup> | 2.99±0.01 <sup>a</sup> | 2.79±0.25 <sup>a</sup>  | 3.10±0.26 <sup>a</sup>  | 2.82±0.01 <sup>a</sup>  | 2.93±0.36 <sup>a</sup>   |
| 1-Tetradecene                                                                           | 1392 | —                       | —                       | 0.62±0.11               | —                       | —                      | —                      | 2.99±0.07              | —                       | 1.20±0.24               | —                       | 1.98±0.32                |
| 6,10-dimethyl-2-Undecanone [3R-(3α,3aβ,7β,8α)]-                                         | 1407 | 3.55±0.02               | 3.94±0.33               | 4.05±0.34               | —                       | 6.08±0.39              | 5.47±0.68              | —                      | 4.02±0.26               | 4.20±0.05               | —                       | —                        |
| 2,3,4,7,8,8a-hexahydro-3,6,8,8-tetramethyl-1H-3a,7-Methanoazulene                       | 1408 | —                       | —                       | 17.11±2.37              | 20.25±3.83              | 16.42±1.83             | 20.17±3.77             | 6.75±0.57              | 6.85±1.16               | 6.44±0.97               | 10.93±0.46              | 18.69±3.47               |
| Dodecanal                                                                               | 1412 | —                       | 1.42±0.20               | —                       | 4.66±0.65               | 1.25±0.20              | 1.18±0.09              | 0.84±0.14              | 0.98±0.09               | —                       | 2.45±0.14               | 1.27±0.02                |

|                                                                |      |                             |                             |                              |                              |                              |                              |                             |                             |                             |                              |                             |
|----------------------------------------------------------------|------|-----------------------------|-----------------------------|------------------------------|------------------------------|------------------------------|------------------------------|-----------------------------|-----------------------------|-----------------------------|------------------------------|-----------------------------|
| Longifolene                                                    | 1412 | —                           | —                           | —                            | —                            | 4.11±0.                      | 2.94±0.                      | 4.58±0.                     | 3.23±0.                     | —                           | 3.40±0.                      | 1.43±0.                     |
|                                                                | .6   |                             |                             |                              |                              | 66                           | 54                           | 39                          | 43                          |                             | 71                           | 16                          |
| α-Ionone                                                       | 1421 | 15.43±<br>2.62 <sup>b</sup> | 15.14±<br>0.62 <sup>b</sup> | 15.13±<br>1.86 <sup>b</sup>  | 22.50±<br>4.34 <sup>c</sup>  | 20.08±<br>1.97 <sup>c</sup>  | 12.99±<br>0.56 <sup>ab</sup> | 10.08±<br>0.28 <sup>a</sup> | 11.30±<br>1.48 <sup>a</sup> | 10.96±<br>0.53 <sup>a</sup> | 13.04±<br>2.33 <sup>ab</sup> | 15.44±<br>1.88 <sup>b</sup> |
| 6-Methyl-6-(5-methylfuran-2-yl)heptan-2-one                    | 1426 | —                           | —                           | 3.79±0<br>.44                | 33.09±<br>5.04               | —                            | 2.83±0.<br>31                | —                           | —                           | —                           | —                            | —                           |
| 4-(2,2,6-trimethyl-7-oxabicyclo[4.1.0]hept-1-yl)-3-Buten-2-one | 1428 | —                           | —                           | 8.27±1<br>.49                | —                            | —                            | —                            | —                           | —                           | —                           | 2.53±0.<br>35                | —                           |
| Ionone                                                         | 1429 | —                           | —                           | 23.66±<br>0.28               | —                            | —                            | 19.49±<br>1.88               | 10.24±<br>0.92              | 4.26±0.<br>54               | —                           | 4.04±0.<br>52                | —                           |
| 4-(2,6,6-trimethyl-1-cyclohexen-1-yl)-2-Butanone               | 1433 | 4.48±0.<br>36               | —                           | 2.48±0<br>.32                | 2.75±0.<br>24                | —                            | —                            | —                           | —                           | —                           | —                            | 3.73±0.<br>25               |
| 6,10-dimethyl-5,9-Undecadien-2-one                             | 1434 | 34.61±<br>6.73 <sup>d</sup> | 29.03±<br>0.59 <sup>c</sup> | 31.08±<br>3.02 <sup>cd</sup> | 16.66±<br>2.97 <sup>ab</sup> | 32.01±<br>3.25 <sup>cd</sup> | 20.95±<br>0.92 <sup>b</sup>  | 11.81±<br>0.46 <sup>a</sup> | 13.46±<br>1.74 <sup>a</sup> | 12.94±<br>0.14 <sup>a</sup> | 14.56±<br>0.89 <sup>a</sup>  | 14.19±<br>2.36 <sup>a</sup> |
| 4-(2,6,6-Trime-thylcyclohexa-1,3-dienyl)but-3-en-2-one         | 1440 | 8.04±0.<br>23 <sup>a</sup>  | 13.17±<br>0.81 <sup>b</sup> | 17.77±<br>2.81 <sup>c</sup>  | 23.54±<br>1.55 <sup>d</sup>  | 26.62±<br>2.64 <sup>e</sup>  | 19.55±<br>0.75 <sup>c</sup>  | 11.73±<br>0.86 <sup>b</sup> | 11.58±<br>1.50 <sup>b</sup> | 13.08±<br>0.23 <sup>b</sup> | 11.62±<br>0.47 <sup>b</sup>  | 13.19±<br>2.58 <sup>b</sup> |

|                                                                                                                                                                          |                            |                                                                |                                                                 |                                                         |                                                         |                                                        |                                                               |                                                   |                                                 |                                                         |                                                   |                                                          |
|--------------------------------------------------------------------------------------------------------------------------------------------------------------------------|----------------------------|----------------------------------------------------------------|-----------------------------------------------------------------|---------------------------------------------------------|---------------------------------------------------------|--------------------------------------------------------|---------------------------------------------------------------|---------------------------------------------------|-------------------------------------------------|---------------------------------------------------------|---------------------------------------------------|----------------------------------------------------------|
| trans-β-Ionone                                                                                                                                                           | 1457                       | 61.66±<br>2.27 <sup>c</sup>                                    | 59.18±<br>2.87 <sup>c</sup>                                     | 63.9±9<br>.36 <sup>c</sup>                              | 56.33±<br>5.05 <sup>c</sup>                             | 75.95±<br>5.35 <sup>d</sup>                            | 47.80±<br>1.19 <sup>b</sup>                                   | 35.30±<br>2.34 <sup>a</sup>                       | 28.51±<br>3.80 <sup>a</sup>                     | 32.33±<br>0.55 <sup>a</sup>                             | 28.8±1.<br>16 <sup>a</sup>                        | 31.45±<br>5.12 <sup>a</sup>                              |
| 1-Dodecanol                                                                                                                                                              | 1457                       | 3.56±0.<br>06 <sup>a</sup>                                     | 5.59±0.<br>20 <sup>b</sup>                                      | 6.27±0<br>.75 <sup>bc</sup>                             | 5.68±0.<br>74 <sup>b</sup>                              | 9.00±0.<br>62 <sup>d</sup>                             | 7.30±0.<br>22 <sup>c</sup>                                    | 5.71±0.<br>46 <sup>b</sup>                        | 5.73±1.<br>13 <sup>b</sup>                      | 7.46±0.<br>68 <sup>c</sup>                              | 6.96±0.<br>93 <sup>c</sup>                        | 7.22±0.<br>24 <sup>c</sup>                               |
| (+)-Valencene                                                                                                                                                            | 1491                       | 4.85±0.<br>33                                                  | 4.41±0.<br>29                                                   | 5.4±0.<br>91                                            | —<br>—                                                  | 4.94±0.<br>35                                          | 2.21±0.<br>23                                                 | 2.57±0.<br>09                                     | 2.00±0.<br>32                                   | —<br>—                                                  | —<br>—                                            | —<br>—                                                   |
| cis-hexahydro-<br>8a-methyl-1,8(<br>2H,5H)-Naphth<br>alenedione                                                                                                          | 1517                       | 28.42±<br>0.95                                                 | —<br>—                                                          | —<br>—                                                  | —<br>—                                                  | —<br>—                                                 | 22.57±<br>0.2                                                 | —<br>—                                            | —<br>—                                          | 16.95±<br>0.67                                          | —<br>—                                            | —<br>—                                                   |
| Butylated<br>Hydroxytoluene<br>(R)-5,6,7,7a-te<br>trahydro-4,4,7a<br>-trimethyl-2(4<br>H)-Benzofuran<br>one,<br>(E)-3,7,11-tri<br>methyl-1,6,10-<br>Dodecatrien-3-<br>ol | 1517<br>.5<br>1525<br>1551 | 1.39±0.<br>13<br>31.72±<br>1.51 <sup>ab</sup><br>4.31±0.<br>14 | 1.50±0.<br>08<br>33.55±<br>3.10 <sup>abc</sup><br>7.80±0.<br>22 | 1.66±0<br>.30<br>43.40±<br>6.44 <sup>bc</sup><br>—<br>— | 1.03±0.<br>02<br>72.09±<br>14.23 <sup>d</sup><br>—<br>— | 0.99±0.<br>09<br>72.4±1<br>0.57 <sup>d</sup><br>—<br>— | 0.66±0.<br>13<br>45.21±<br>6.16 <sup>c</sup><br>7.56±0.<br>24 | —<br>—<br>33.06±<br>1.47 <sup>abc</sup><br>—<br>— | —<br>—<br>30.34±<br>5.95 <sup>a</sup><br>—<br>— | —<br>—<br>44.20±<br>5.88 <sup>bc</sup><br>4.03±0.<br>20 | —<br>—<br>34.16±<br>1.14 <sup>abc</sup><br>—<br>— | —<br>—<br>33.48±<br>1.59 <sup>abc</sup><br>4.24±0.<br>15 |
| 2,4-Di-tert-but<br>ylphenol                                                                                                                                              | 1555                       | 16.86±<br>1.65 <sup>a</sup>                                    | 19.54±<br>1.14 <sup>ab</sup>                                    | 21.46±<br>3.21 <sup>abc</sup>                           | 19.50±<br>3.05 <sup>ab</sup>                            | 35.94±<br>2.87 <sup>d</sup>                            | 26.11±<br>0.39 <sup>c</sup>                                   | 22.37±<br>1.31 <sup>bc</sup>                      | 19.52±<br>2.73 <sup>ab</sup>                    | 24.38±<br>3.57 <sup>bc</sup>                            | 24.94±<br>4.67 <sup>c</sup>                       | 24.68±<br>3.04 <sup>bc</sup>                             |
| n-Nonylcycloh<br>exane                                                                                                                                                   | 1556                       | —                                                              | —                                                               | —                                                       | —                                                       | —                                                      | —                                                             | —                                                 | —                                               | 4.66±0.<br>29                                           | 6.94±0.<br>95                                     | 6.10±0.<br>88                                            |

|                                                       |            |                               |                               |                             |                              |                              |                               |                               |                              |                               |                              |                              |
|-------------------------------------------------------|------------|-------------------------------|-------------------------------|-----------------------------|------------------------------|------------------------------|-------------------------------|-------------------------------|------------------------------|-------------------------------|------------------------------|------------------------------|
| Methanone,<br>dicyclohexyl–                           | 1576       | 18.32±<br>0.71 <sup>bcd</sup> | 18.43±<br>1.31 <sup>bcd</sup> | 21.86±<br>3.22 <sup>d</sup> | 21.84±<br>4.21 <sup>d</sup>  | 28.70±<br>3.46 <sup>e</sup>  | 19.76±<br>0.95 <sup>bcd</sup> | 16.31±<br>2.43 <sup>abc</sup> | 12.81±<br>2.04 <sup>a</sup>  | 18.14±<br>2.48 <sup>bcd</sup> | 15.45±<br>0.71 <sup>ab</sup> | 20.52±<br>3.81 <sup>cd</sup> |
| 2,2,4–Trimethyl<br>–1,3–pentanedi<br>ol diisobutyrate | 1587<br>.5 | 7.82±0.<br>15 <sup>b</sup>    | 15.79±<br>0.66 <sup>g</sup>   | 16.20±<br>0.46 <sup>g</sup> | 10.78±<br>0.20 <sup>de</sup> | 9.14±0.<br>68 <sup>bc</sup>  | 20.42±<br>0.46 <sup>h</sup>   | 5.73±0.<br>87 <sup>a</sup>    | 10.15±<br>1.67 <sup>cd</sup> | 11.94±<br>0.60 <sup>e</sup>   | 13.91±<br>0.21 <sup>f</sup>  | 13.90±<br>1.77 <sup>f</sup>  |
| Cedrol                                                | 1607<br>.9 | –                             | 11.23±<br>0.02                | 18.63±<br>1.21              | 7.36±1.<br>05                | 17.59±<br>1.29               | 12.45±<br>0.08                | 15.94±<br>0.56                | 30.98±<br>4.02               | 30.57±<br>2.25                | 37.09±<br>0.57               | 31.47±<br>4.95               |
| Tetradecanal                                          | 1614       | –                             | –                             | –                           | 1.63±0.<br>05                | –                            | –                             | 5.98±0.<br>23                 | –                            | –                             | –                            | 7.23±1.<br>46                |
| Benzophenone                                          | 1664       | –                             | –                             | 14.89±<br>2.63              | 3.83±0.<br>12                | 9.30±0.<br>49                | 11.12±<br>1.08                | –                             | 8.18±0.<br>94                | 10.74±<br>0.29                | 7.49±1.<br>23                | 7.25±0.<br>74                |
| 2,2',5,5'–tetram<br>ethyl–1,1'–Biph<br>enyl           | 1668<br>.5 | –                             | –                             | –                           | –                            | –                            | –                             | 1.56±0.<br>09                 | 1.22±0.<br>18                | –                             | 1.22±0.<br>02                | 1.39±0.<br>16                |
| 2–hexyl–1–Dec<br>anol                                 | 1790       | 5.40±0.<br>18                 | –                             | –                           | –                            | –                            | –                             | –                             | –                            | 6.05±0.<br>77                 | 9.29±0.<br>05                | 6.56±1.<br>18                |
| 3,4–diethyl–1,1<br>'–Biphenyl                         | 1792       | –                             | 11.24±<br>0.26                | –                           | –                            | –                            | 28.4±1.<br>82                 | –                             | 12.51±<br>1.53               | –                             | –                            | 10.7±0.<br>49                |
| Neophytadiene                                         | 1840       | 21.12±<br>0.02 <sup>e</sup>   | 22.90±<br>2.62 <sup>ef</sup>  | 25.74±<br>5.10 <sup>f</sup> | 16.80±<br>1.99 <sup>cd</sup> | 25.51±<br>0.77 <sup>f</sup>  | 19.01±<br>2.47 <sup>de</sup>  | 13.37±<br>2.20 <sup>bc</sup>  | 13.39±<br>2.31 <sup>bc</sup> | 16.89±<br>0.72 <sup>cd</sup>  | 11.20±<br>0.05 <sup>ab</sup> | 8.99±1.<br>41 <sup>a</sup>   |
| Dodecylcyclohe<br>xane                                | 1864       | 2.73±0.<br>36 <sup>a</sup>    | 3.48±0.<br>13 <sup>ab</sup>   | 8.83±1<br>.48 <sup>e</sup>  | 6.67±0.<br>73 <sup>d</sup>   | 4.66±0.<br>41 <sup>bc</sup>  | 6.84±0.<br>55 <sup>d</sup>    | 5.97±0.<br>20 <sup>cd</sup>   | 4.67±0.<br>68 <sup>bc</sup>  | 4.80±0.<br>75 <sup>bc</sup>   | 5.84±0.<br>95 <sup>cd</sup>  | 4.01±0.<br>55 <sup>b</sup>   |
| Phytol                                                | 2045       | 16.50±<br>1.15 <sup>de</sup>  | 24.40±<br>2.06 <sup>f</sup>   | 23.47±<br>1.53 <sup>f</sup> | 14.73±<br>2.26 <sup>cd</sup> | 16.69±<br>1.21 <sup>de</sup> | 18.51±<br>3.07 <sup>e</sup>   | 14.36±<br>2.81 <sup>cd</sup>  | 11.28±<br>2.02 <sup>bc</sup> | 13.83±<br>0.87 <sup>cd</sup>  | 8.48±1.<br>24 <sup>ab</sup>  | 7.63±0.<br>99 <sup>a</sup>   |
| Decanoic acid,<br>methyl ester                        | 1282       | –                             | –                             | –                           | 16.38±<br>1.25               | –                            | 14.87±<br>1.95                | 10.06±<br>0.38                | 9.18±0.<br>42                | –                             | –                            | –                            |

|                                        |      |               |               |   |   |                |               |   |               |   |               |               |   |
|----------------------------------------|------|---------------|---------------|---|---|----------------|---------------|---|---------------|---|---------------|---------------|---|
| n-Hexadecanoic acid                    | 1968 | —             | —             | — | — | 40.59±<br>4.43 | —             | — | —             | — | —             | —             | — |
| 1-Decanol                              | 1258 | —             | —             | — | — | 9.67±0.<br>92  | 5.48±0.<br>3  | — | 4.07±0.<br>29 | — | —             | —             | — |
| Sulfurous acid, butyl tetradecyl ester | 2434 | 3.34±0.<br>56 | 2.15±0.<br>19 | — | — | 2.22±0.<br>20  | 1.87±0.<br>08 | — | —             | — | 1.25±0.<br>15 | 1.33±0.<br>12 | — |

<sup>a</sup> RI =Retention index of aroma compounds on HP-5MS UI Column; RI were obtained from NIST Chemistry WebBook.(<https://webbook.nist.gov/chemistry/name-ser/>)

<sup>b</sup> Concentrations of aroma compounds in T0, T1, T2,T3, T4, T5, T6, T7, T8, T9 and T10 were represented RAPT samples from eleven different aging years, respectively; values with different letters (a–h) in a row are significantly using Duncan’s multiple comparison tests (  $p < 0.05$  ).

<sup>c</sup> All the above aroma compounds were identified by MS and RI values, except. Phytol, Decanoic acid, methyl ester, n-Hexadecanoic acid , 1-Decanol and Sulfurous acid, butyl tetradecyl ester is identified by MS

**Table S2**

Key volatile compounds identified in RAPT samples from different years of storage

| Volatile compounds | Class | Odor                | Thresho<br>ld(μg/kg) | OAV |     |     |     |     |     |     |     |     |     |     | ACI(%) |
|--------------------|-------|---------------------|----------------------|-----|-----|-----|-----|-----|-----|-----|-----|-----|-----|-----|--------|
|                    |       |                     |                      | T0  | T1  | T2  | T3  | T4  | T5  | T6  | T7  | T8  | T9  | T10 |        |
| DL-Menthol         | Woody | mint-like,<br>woody | 1000                 | 0.5 | 0.6 | 0.7 | 0.8 | 0.7 | 0.5 | 0.5 | 0.5 | 0.5 | 0.4 | 1.8 | <0     |

[illegible]

|                                                     |                  |                                                    |       |        |        |        |        |       |        |        |        |        |        |        |               |
|-----------------------------------------------------|------------------|----------------------------------------------------|-------|--------|--------|--------|--------|-------|--------|--------|--------|--------|--------|--------|---------------|
| Octanoic acid                                       | Cheese<br>flavor | Carrot-like,<br>musty<br>Cheese,<br>fat<br>Flowery | 190   | 0.7    | 0.8    | 1.4    | 1.6    | 1.7   | 1.3    | 0.2    | 0.4    | 0.4    | 0.5    | 0.8    | <0            |
| $\alpha$ -Ionone                                    | Floral           | '<br>violet-like<br>Lilac<br>and<br>hyacinth-like  | 0.4   | 385.8  | 378.5  | 378.1  | 562.5  | 501.9 | 324.9  | 251.9  | 282.4  | 274.1  | 326    | 386    | 0.06~<br>0.62 |
| Benzeneacetal<br>dehyde                             | Floral           |                                                    | 4     | 29.8   | 24.9   | 30     | 56.7   | 56.1  | 29.1   | 30.6   | 30.6   | 48.1   | 35.3   | 42.9   | 0~0.0<br>6    |
| 2,6,6-trimethyl-1,3-Cyclohexadiene-1-carboxaldehyde | Woody            | Woody,<br>herbal                                   | 3     | 82.2   | 73.7   | 88.1   | 108.4  | 118.8 | 91.6   | 69.4   | 48.9   | 59.9   | 54.3   | 53.5   | 0.01~<br>0.12 |
| (E,E)-2,4-Heptadienal                               | Floral           | Fatty,<br>flowery                                  | 0.032 | 3598.6 | 3248.6 | 3338.5 | 4774.2 | 5892  | 3473.1 | 4117.8 | 3857.1 | 4501.8 | 4416.6 | 4351.2 | 0.55~<br>7.76 |
| 1,2-dimethoxy-Benzene                               | Stale            | Sweet<br>and<br>Musty                              | 3.17  | 20.5   | 37.4   | 53.2   | 54.2   | 54.4  | 51.1   | 30.5   | 26.1   | 25.2   | 33.6   | 42.7   | 0.01~<br>0.06 |
| (Z)-3,7-dimethyl-2,6-Octadien-1-ol                  | Floral&fruity    | Citrus-like,Floral                                 | 49    | 2.7    | 3.2    | 4.3    | 6.2    | 5.9   | 4.1    | 2.5    | 2.6    | 3.3    | 2.9    | 2.7    | 0~0.0<br>1    |



|                                                |               |                         |        |        |        |        |        |        |        |        |      |        |        |        |           |
|------------------------------------------------|---------------|-------------------------|--------|--------|--------|--------|--------|--------|--------|--------|------|--------|--------|--------|-----------|
| 6-methyl-5-Hepten-2-one                        | Fruity        | Citrus-like, apple-like | 50     | 3.9    | 3      | 2.6    | 3.3    | 4.4    | 3.5    | 2.2    | 2    | 1.9    | 2.7    | 2.6    | 0~0.01    |
| 1-Octanol                                      | Floral&fruity | Rose-like or lemon-like | 0.8    | 255.1  | 317.3  | 346    | 620.8  | 497.9  | 336.4  | 106.6  | 95.2 | 158.4  | 126.8  | 131.8  | 0.06~0.64 |
| Nonanoic acid                                  | Stale         | Moldy, pungent          | 26     | 9      | 8.6    | 15.8   | 14     | 16.8   | 11.1   | 3.6    | 4.1  | 5.6    | 6      | 4.3    | 0~0.01    |
| 2,6,6-trimethyl-1-Cyclohexene-1-carboxaldehyde | —             | —                       | 5      | 49.2   | 35.6   | 38.6   | 52.8   | 54     | 27.8   | 20.4   | 16.6 | 19.6   | 18.1   | 19.9   | 0.01~0.05 |
| 1-Octen-3-ol                                   | Green         | Mushroom-like, green    | 45     | 21.3   | 11.5   | 5.9    | 5.1    | 8.2    | 4.8    | 2.6    | 2.7  | 2.8    | 3.8    | 3.4    | 0~0.01    |
| 1-(1H-pyrrol-2-yl)-Ethanol                     | Nutty         | Nutty, musty            | 3.4    | 41.2   | 39.3   | 39     | 75.9   | 68     | 49     | 34.8   | 35.3 | 38.1   | 36.4   | 29.2   | 0.01~0.08 |
| Octanal                                        | Fruity        | Citrus-like, soapy      | 0.0455 | 1600.9 | 1455.3 | 1320.7 | 1376.8 | 4131.4 | 2432.5 | 1534.7 | 1365 | 1880.6 | 1836.4 | 1632.4 | 0.25~3.52 |
| 1-Dodecanol                                    | Fatty         | Fatty, soapy            | 6.1    | 5.8    | 9.2    | 10.3   | 9.3    | 14.8   | 12     | 9.4    | 9.4  | 12.2   | 11.4   | 11.8   | 0~0.02    |

|                                                              |               |                             |       |      |      |      |      |      |      |      |      |      |      |      |        |
|--------------------------------------------------------------|---------------|-----------------------------|-------|------|------|------|------|------|------|------|------|------|------|------|--------|
| 1-Nonanol                                                    | Floral        | rose-like                   | 11    | 9.8  | 7.6  | 10.5 | 15.8 | 17.9 | 9.5  | 8.2  | 7.3  | 6.3  | 7    | 5.9  | 0~0.02 |
| Heptanal                                                     | Fatty         | Citrus-like, fatty          | 9.7   | 4.7  | 4.7  | 8    | 6.9  | 9    | 7.3  | 7.2  | 3.5  | 7.8  | 5.9  | 5.3  | 0~0.01 |
| Isophorone                                                   | Woody         | Woody Coconut, creamy,      | 3000  | <0.1 | <0.1 | <0.1 | <0.1 | <0.1 | <0.1 | <0.1 | <0.1 | <0.1 | <0.1 | <0.1 | <0     |
| Dihydro-5-pentyl-2(3H)-Furanone                              | Cheese flavor | waxy with fatty milky notes | 4.5   | 17.4 | 6.3  | 11.5 | 8.5  | 20.1 | 13.3 | 9.7  | 6.8  | 6.8  | 12.9 | 8    | 0~0.02 |
| (E)-1-(2,6,6-trimethyl-1,3-cyclohexadien-1-yl)-2-Buten-1-one | Floral&fruity | apple-like, rose-like       | 1000  | <0.1 | <0.1 | 0.1  | 0.1  | 0.1  | <0.1 | <0.1 | <0.1 | <0.1 | <0.1 | <0.1 | <0     |
| 2-Heptanone                                                  | Fruity        | cabbage-like                | 70    | 0.6  | 0.6  | 0.4  | 0.5  | 0.8  | 0.7  | 0.4  | 0.3  | 0.4  | 0.6  | 0.3  | <0     |
| 3-methyl-Butanoic acid                                       | Cheese flavor | Cheese-like                 | 10000 | <0.1 | <0.1 | <0.1 | <0.1 | <0.1 | <0.1 | <0.1 | <0.1 | <0.1 | <0.1 | <0.1 | <0     |
| 1-Hexanol                                                    | Green         | Green, grassy               | 40    | 1.4  | 1.4  | 0.8  | 1    | 1.2  | 0.8  | 0.6  | 0.5  | 0.8  | 0.4  | 0.6  | <0     |

|                        |                  |                         |        |          |          |      |      |      |       |     |     |     |       |       |         |
|------------------------|------------------|-------------------------|--------|----------|----------|------|------|------|-------|-----|-----|-----|-------|-------|---------|
| p-Xylene               | Chemical         | Plastic,<br>green,      | 60     | 0.3      | 0.3      | 0.3  | 1    | 0.7  | 0.3   | 0.4 | 0.4 | 0.5 | 0.4   | 0.4   | <0      |
| 2-methyl-Butanoic acid | Cheese<br>flavor | Butter,<br>cheese-like  | 15     | 3.4      | 3        | 1.6  | 2.2  | 2.1  | 1.7   | 0.4 | 0.7 | 0.4 | 0.9   | 1     | <0      |
| $\alpha$ -Pinene       | Woody            | Fresh,<br>woody         | 48     | 0.1      | 0.1      | 0.1  | 0.1  | 0.2  | 0.2   | 0.2 | 0.2 | 0.2 | 0.2   | 0.2   | <0      |
| (Z)-3-Hexen-1-ol       | Green            | Grass                   | 0.0002 | 151243.8 | 145866.1 | ND   | ND   | ND   | ND    | ND  | ND  | ND  | ND    | ND    | 0~40.33 |
| 1-ethyl-1H-Pyrrole     | Roasted          | Burnt,<br>roasted       | 3      | 4.6      | 3.2      | ND   | ND   | ND   | ND    | ND  | ND  | ND  | ND    | ND    | <0      |
| Methyl salicylate      | Green            | wintergreen             | 10     | 39.3     | 29.7     | 35.3 | 37.5 | ND   | ND    | ND  | ND  | ND  | ND    | ND    | 0~0.04  |
| Phenylethyl Alcohol    | Floral&fruity    | Rose-like               | 9      | 24.9     | 21.9     | 29.4 | 38   | 35.7 | 19.1  | ND  | 14  | 7   | 15.3  | ND    | 0~0.04  |
| $\beta$ -Myrcene       | Woody            | Pepper-like,carrot-like | 0.75   | ND       | 239.3    | ND   | ND   | ND   | 280.2 | ND  | ND  | ND  | 215.1 | 171.3 | 0~0.41  |
| Tetradecanal           | Chemical         | Alkane                  | 60     | ND       | ND       | ND   | 0.3  | ND   | ND    | 1   | ND  | ND  | ND    | 1.2   | <0      |
| 1-Decanol              | Floral&fruity    | orange-like,<br>floral  | 23     | ND       | ND       | ND   | ND   | 4.2  | 2.4   | ND  | 1.8 | ND  | ND    | ND    | <0      |
| Naphthalene            | Chemical         | pungent<br>dry tarry    | 50     | 0.5      | 0.7      | 0.9  | ND   | 1.6  | ND    | ND  | ND  | 0.8 | ND    | ND    | <0      |

|                                                             |                   |                                              |        |              |        |              |      |      |              |     |      |              |      |              |             |
|-------------------------------------------------------------|-------------------|----------------------------------------------|--------|--------------|--------|--------------|------|------|--------------|-----|------|--------------|------|--------------|-------------|
| 2,3-dihydro-<br>Benzofuran                                  | Chemical          | Tar-like<br>,<br>pungent                     | 48     | 1.3          | 1.1    | 1.2          | 1.6  | 1.7  | 1            | 0.9 | 0.6  | 0.9          | ND   | ND           | <0          |
| 1-Oxaspiro[4.<br>5]dec-6-ene,<br>2,6,10,10-tetr<br>amethyl- | Woody             | Herbal                                       | 0.0002 | 329594.<br>6 | 345510 | 259316.<br>6 | ND   | ND   | 220607.<br>8 | ND  | ND   | 128021.<br>3 | ND   | 180540.<br>2 | 0~76.<br>48 |
| Benzyl<br>alcohol                                           | Floral&fr<br>uity | Rose-li<br>ke,<br>cherry-l<br>ike<br>Flowery | 5500   | <0.1         | ND     | ND           | <0.1 | ND   | ND           | ND  | ND   | ND           | ND   | ND           | <0          |
| Ionone                                                      | Floral            | ,<br>violet-li<br>ke                         | 1500   | ND           | ND     | 0.2          | ND   | ND   | 0.1          | 0.1 | <0.1 | ND           | <0.1 | ND           | <0          |
| (E)-2-Octena<br>l                                           | Green             | Green                                        | 3      | ND           | ND     | ND           | ND   | ND   | ND           | ND  | 7    | ND           | 9.6  | ND           | 0~0.0<br>2  |
| 2,6-dimethox<br>y-Phenol                                    | Chemical          | phenolic<br>, smoky,<br>woody                | 400    | v            | <0.1   | ND           | ND   | ND   | ND           | ND  | ND   | ND           | ND   | ND           | <0          |
| (E,E)-2,6-No<br>nadienal                                    | Green             | cucumb<br>er-like,<br>grren                  | 1      | ND           | ND     | ND           | ND   | ND   | 18.9         | ND  | 13.8 | ND           | ND   | 14.9         | 0~0.0<br>3  |
| Dodecanal                                                   | Green             | Green,s<br>oapy,citr<br>us-like              | 1.07   | ND           | 13.3   | ND           | 43.5 | 11.7 | 11.1         | 7.8 | 9.2  | ND           | 22.9 | 11.9         | 0~0.0<br>4  |

|                                   |        |                            |      |     |      |      |    |      |      |      |      |      |      |      |            |
|-----------------------------------|--------|----------------------------|------|-----|------|------|----|------|------|------|------|------|------|------|------------|
| Indole                            | Floral | Floral,<br>animal–<br>like | 500  | 0.1 | ND   | <0.1 | ND | ND   | ND   | ND   | ND   | <0.1 | <0.1 | ND   | <0         |
| Hexanoic<br>acid, methyl<br>ester | Fruity | Pine<br>apple–li<br>ke     | 10   | ND  | ND   | ND   | ND | 1    | ND   | 0.4  | 2.4  | 0.5  | ND   | ND   | <0         |
| 2–Octanone                        | Woody  | Woody,<br>Herbal           | 50   | 0.1 | ND   | ND   | ND | ND   | 0.3  | ND   | ND   | ND   | ND   | ND   | <0         |
| 2–butoxy–Eth<br>anol              | –      | –                          | 2600 | ND  | <0.1 | ND   | ND | <0.1 | ND   | <0.1 | <0.1 | <0.1 | <0.1 | <0.1 | <0         |
| Hexanal                           | Green  | Green                      | 9    | ND  | 0.5  | 6.7  | ND | ND   | 1.5  | 0.5  | 0.6  | 0.6  | 0.7  | 0.7  | <0         |
| 1,2,3–Trimeth<br>oxybenzene       | Stale  | Stale<br>and<br>Musty      | 0.75 | ND  | ND   | 31.1 | ND | 46.3 | 33.6 | 38.4 | 28.5 | 12.3 | 35.7 | 25.3 | 0–0.0<br>7 |

<sup>a</sup> OT = Odor thresholds

<sup>b</sup> ND, the compounds was not detected

<sup>c</sup> All the odor thresholds were obtained from previous research [9, 27, 36 – 39].

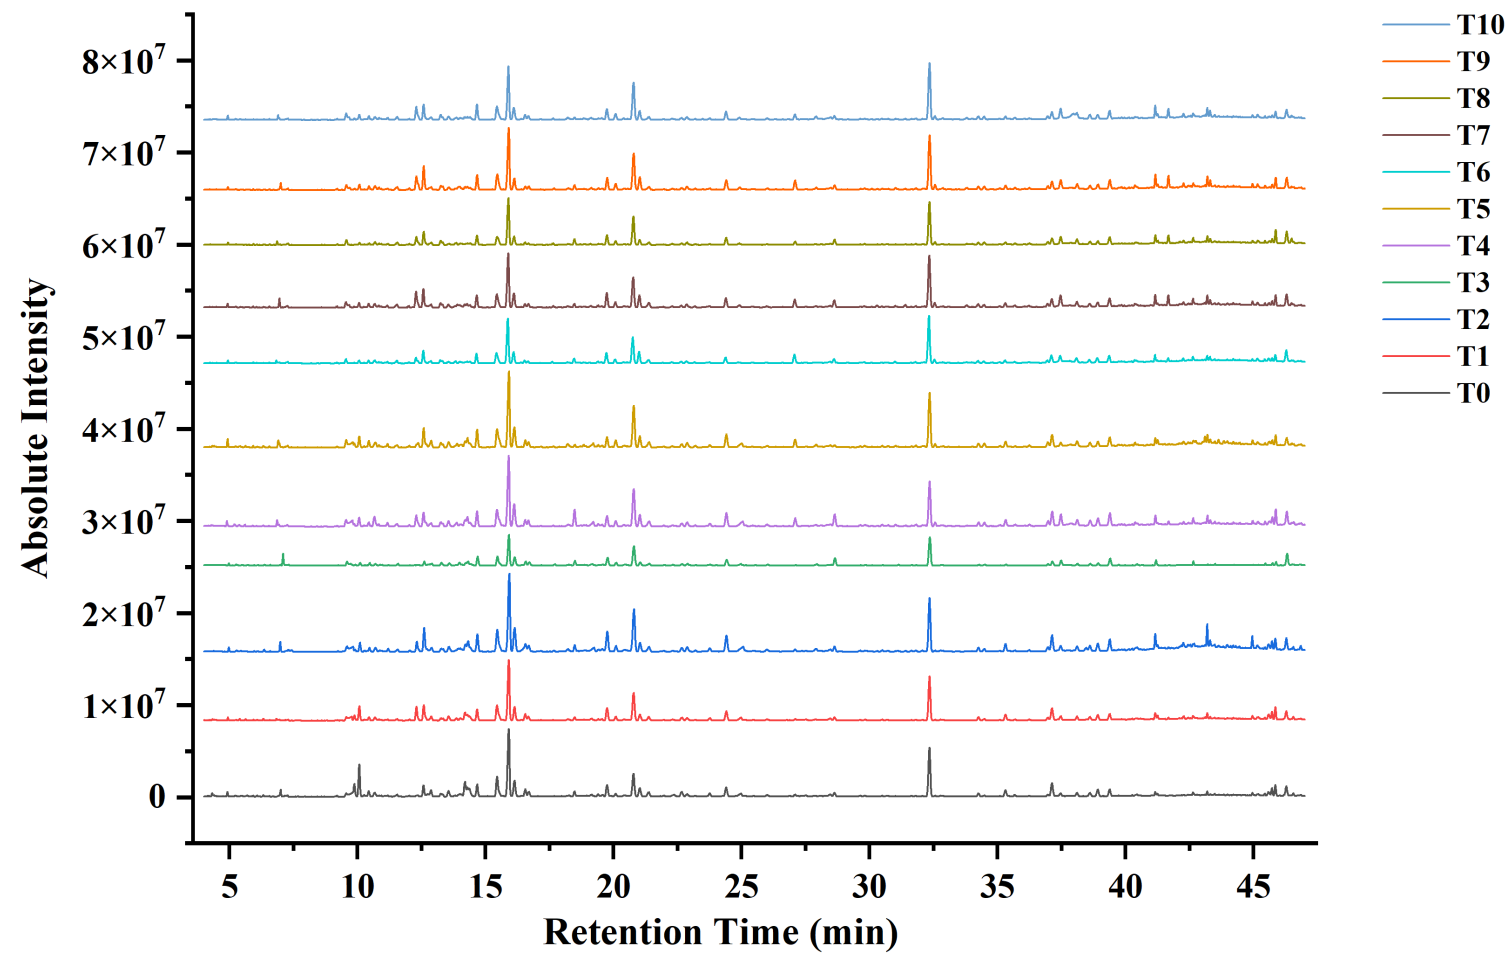

**Figure S1** Total ion chromatograms (TIC) of aroma compounds in RAPT

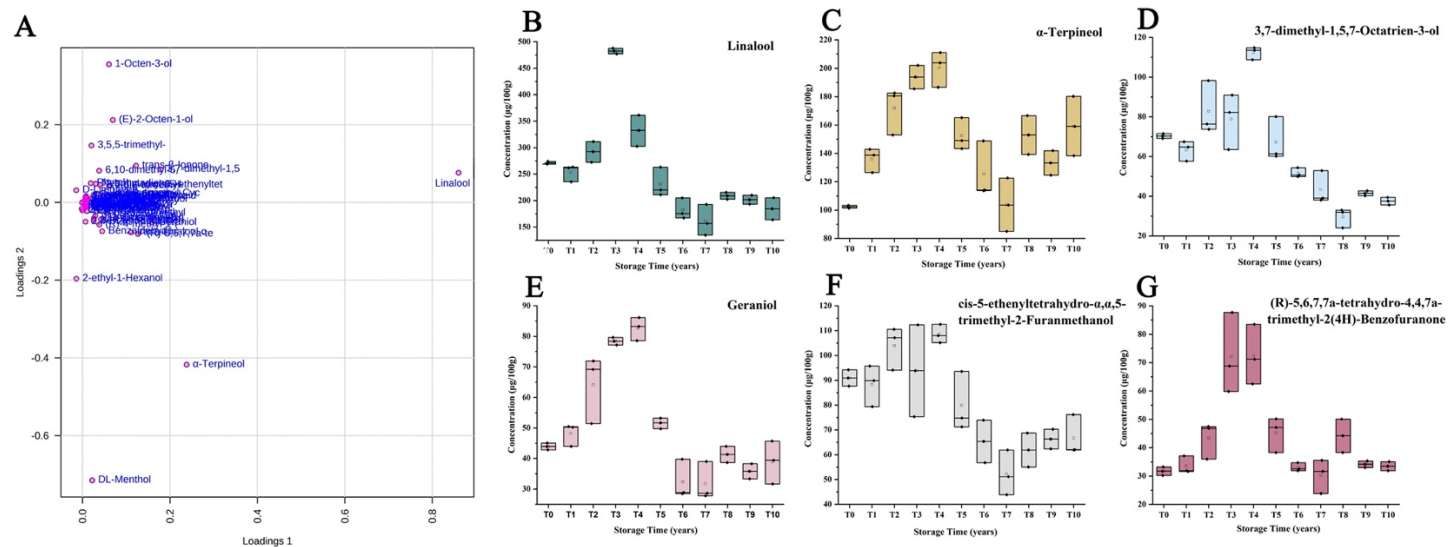

**Figure S2** Multivariate statistical analysis of volatile compounds and during RAPT storage (a) loadings plot (b–g) Comparison of the accurate contents of differential compounds screened by loadings plot

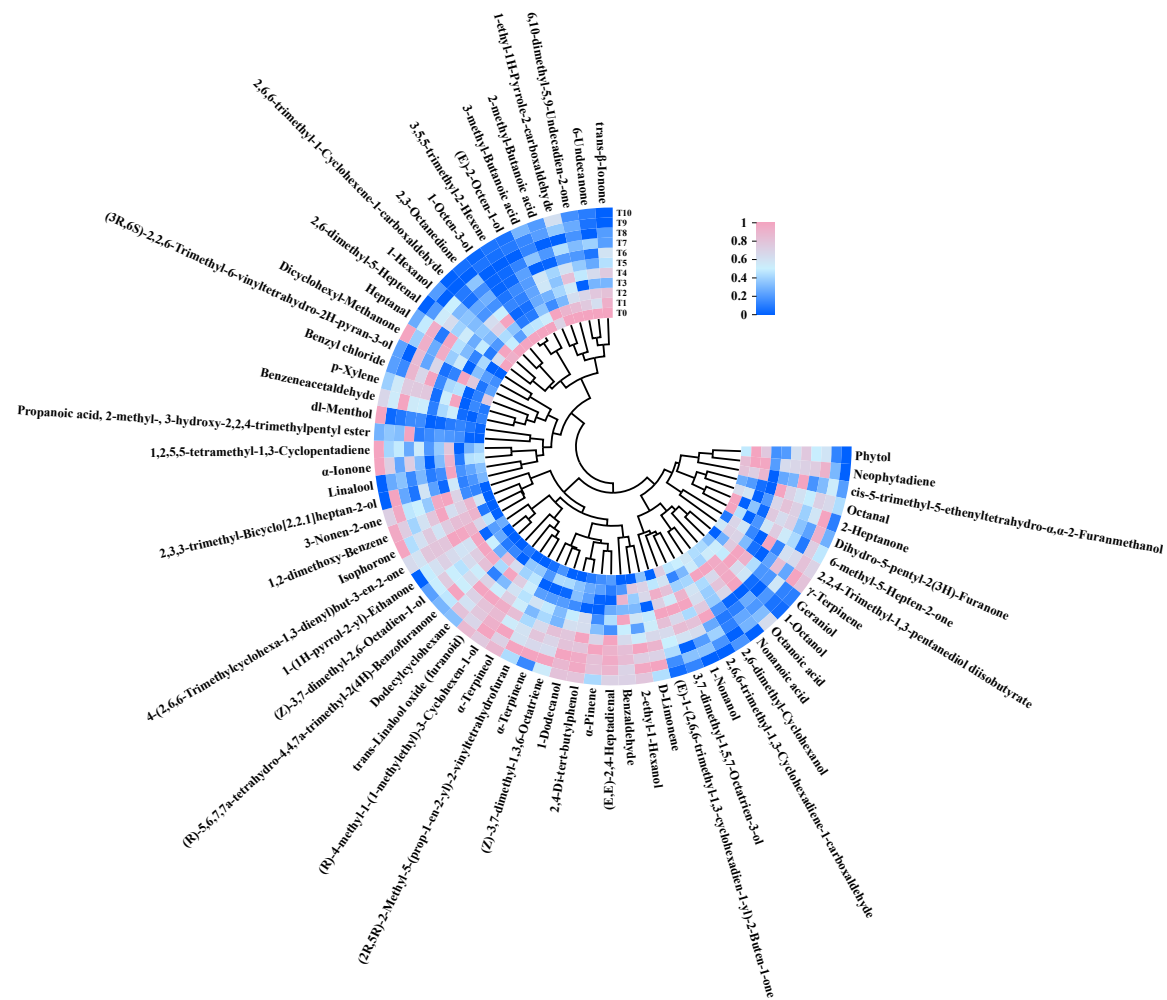



**Figure S3** Heat map of differential volatile compounds in the samples of RAPT at various storage time points (Relative content)
